# Supplementary material for: A new method to measure mechanics and dynamic assembly of branched actin networks
Source: PubMed Central journal article supplement (PMC5691053; doi:10.1038/s41598-017-15638-5), 2017-11-16
Supplement: 41598_2017_15638_MOESM1_ESM.pdf [file 41598_2017_15638_MOESM1_ESM.pdf]

# A new method to measure mechanics and dynamic assembly of branched actin networks

Pierre Bauer<sup>1</sup>, Joseph Tavaoli<sup>1, 2</sup>, Thomas Pujol<sup>1, 3</sup>, Jessica Planade<sup>1</sup>, Olivia du Roure<sup>1,\*,+</sup>, and Julien Heuvingh<sup>1,\*,+</sup>

<sup>1</sup> ESPCI Paris, PSL Research University, CNRS, Universite Pierre et Marie Curie, Universite Paris Diderot, Physique et Mecanique des Milieux Heterogenes, UMR 7636, Paris, 75005, France

<sup>2</sup>Present address: Technical University of Denmark, Department of Energy of Conversion and Storage, Roskilde, Denmark.

<sup>3</sup>Present address: Centre for Genomic Regulation, The Barcelona Institute of Science and Technology, and Universitat Pompeu Fabra, Cell and Developmental Biology, Barcelona, Spain

\*olivia.durore@espci.fr, julien.heuvingh@espci.fr

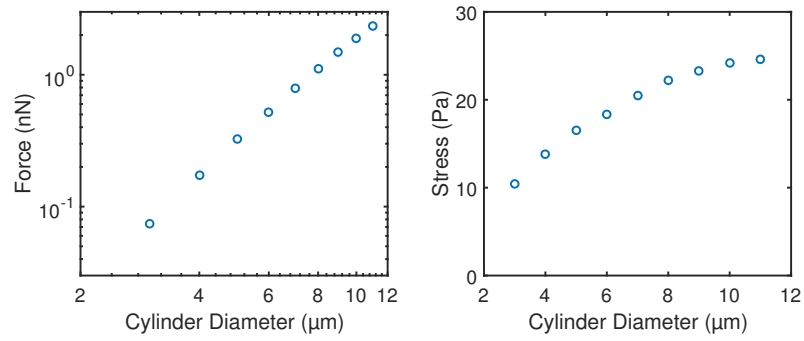

Figure 1: Relationship between force (left) or stress (right) and the diameter of the cylinders calculated by finite element analysis. The cylinder length is fixed at 12  $\mu\text{m}$ , the distance between faces at 2  $\mu\text{m}$  and the external magnetic field at 40 mT

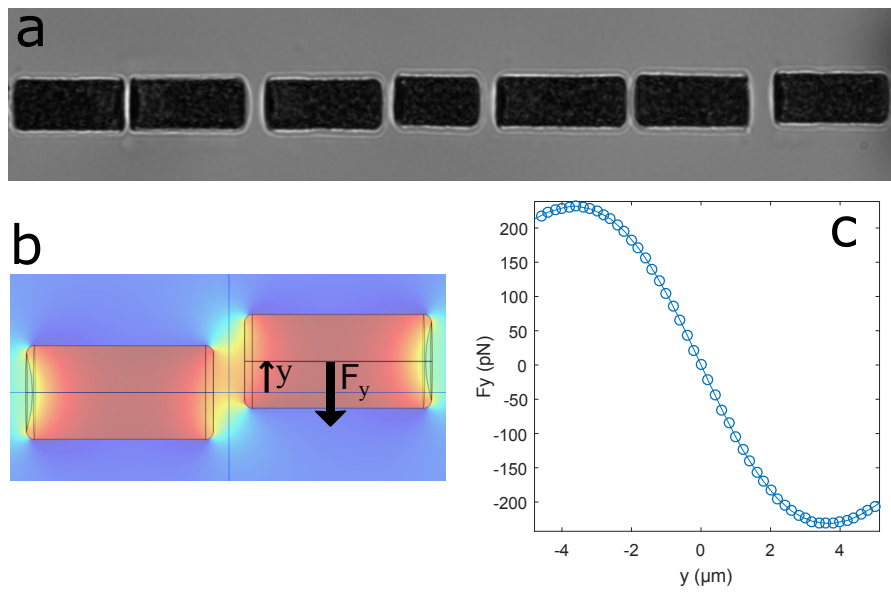

Figure 2: Alignment of magnetic cylinders. a. image of a chain of  $6 \mu\text{m}$  wide cylinders, spaced by a growing actin network. There is minimal sliding of each cylinder's axis from the chain axis. b. scheme of finite element analysis where one cylinder axis was shifted at a distance  $y$  from the axis of the other cylinder. c. Finite element calculation of the transversal force  $F_y$  restoring the cylinder's axis to alignment.

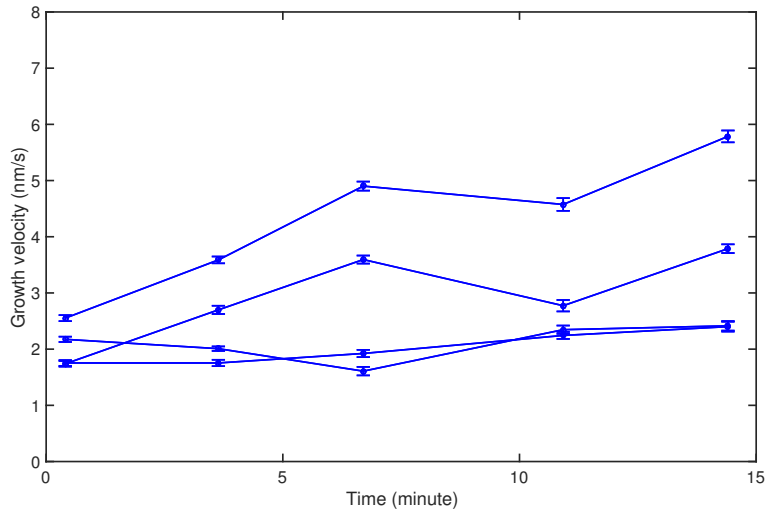

Figure 3: Evolution of the recorded velocities of network growth at stresses below one Pa for four different networks.

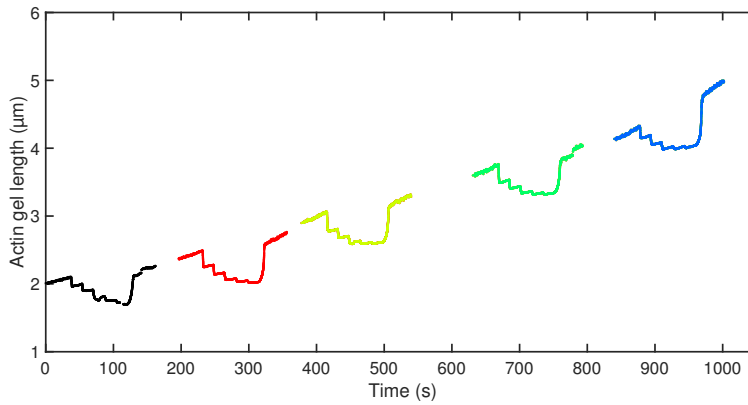

Figure 4: Actin gel length as a function of time while the magnetic field is repeatedly increased: each color represents the actin length when gel is submitted to the stepped increase of the magnetic field from 3 to 80mT. The similarity of the length variation at each repetition suggests an absence of history-dependence.
